# Supplementary material for: Guided genetic screen to identify genes essential in the regeneration of hair cells and other tissues
Source: PubMed Central journal article supplement (PMC5986822; doi:10.1038/s41536-018-0050-7), 2018-06-04

Suppl. Fig. 6

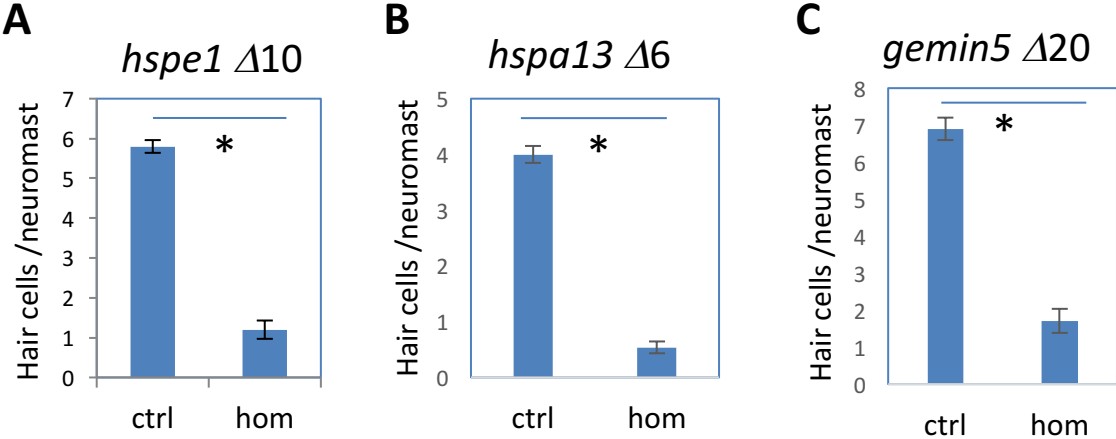

Supplement: 41536_2018_50_MOESM7_ESM.pdf [file 41536_2018_50_MOESM7_ESM.pdf]
